# Supplementary material for: Metagenomics of African Empogona and Tricalysia (Rubiaceae) reveals the presence of leaf endophytes
Source: PeerJ journal article supplement (doi:10.7717/peerj.15778), 2023-08-04

**A**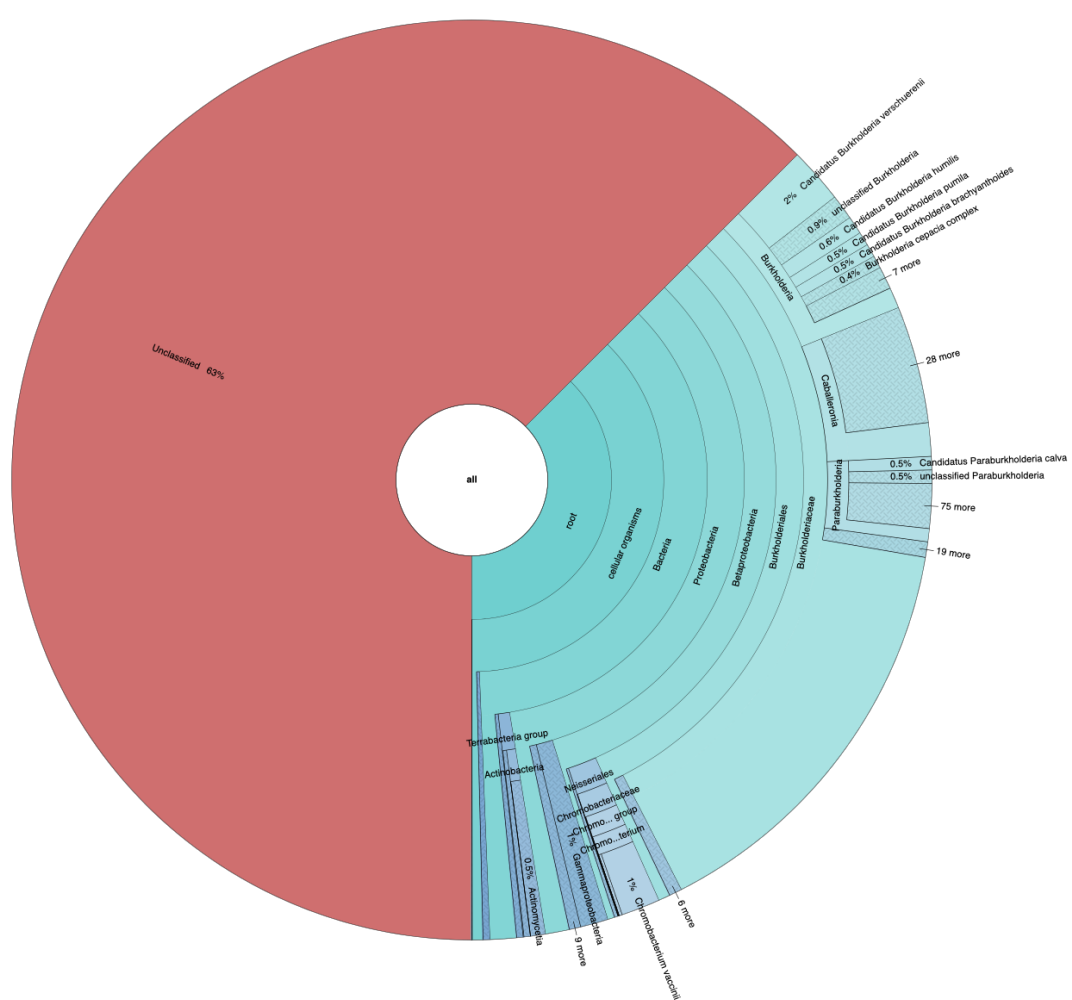**B**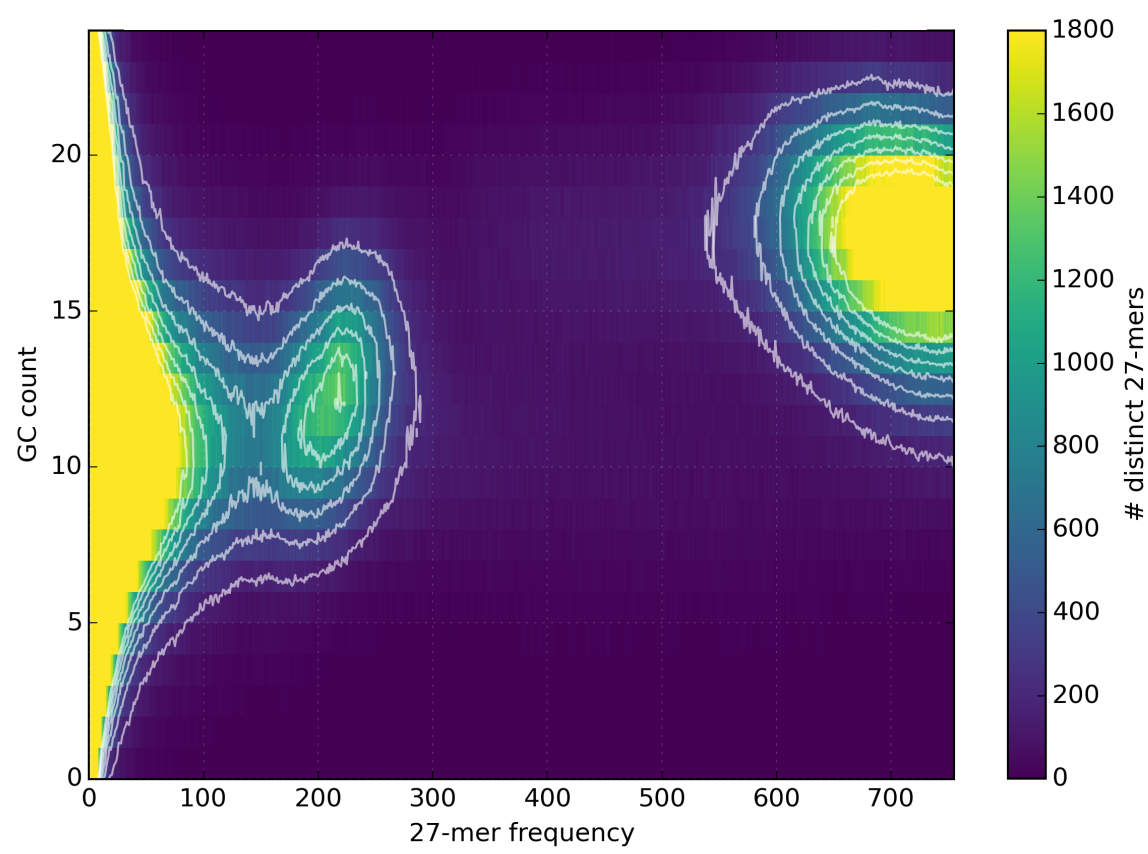**C**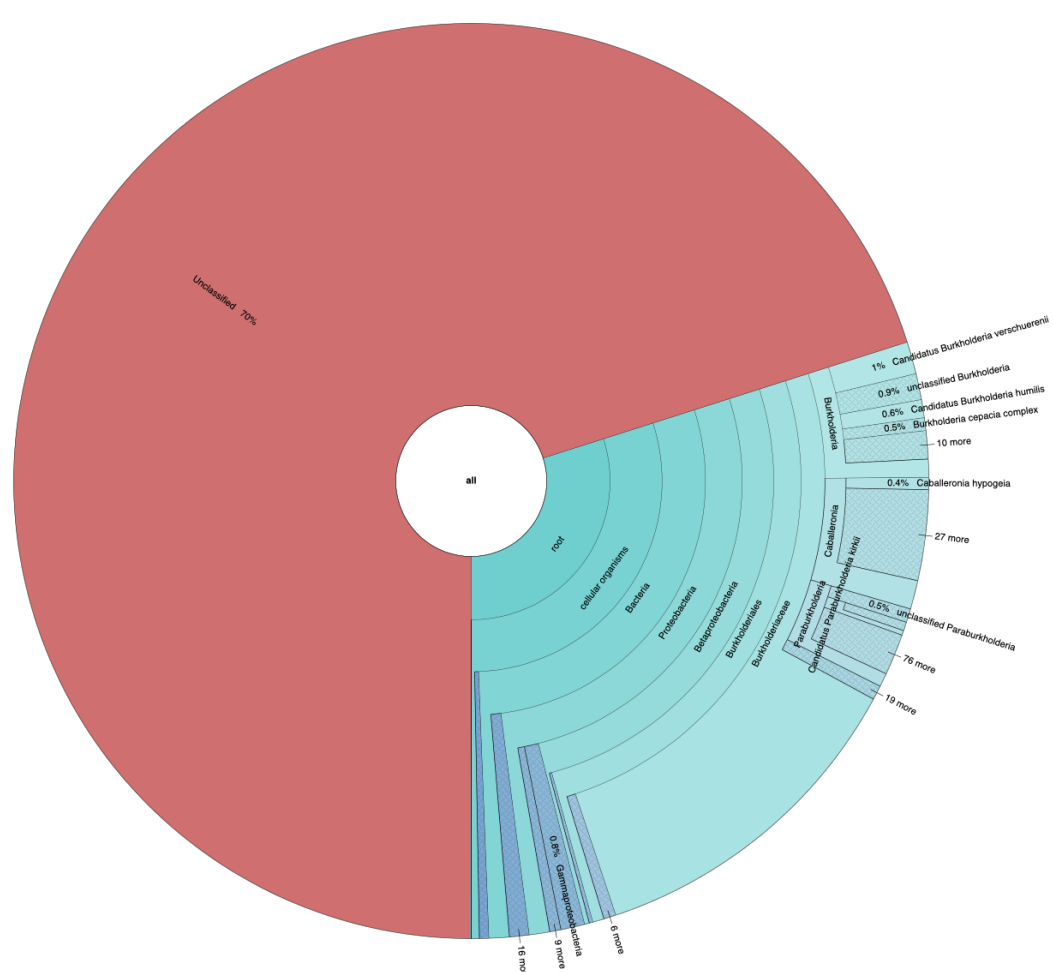**D**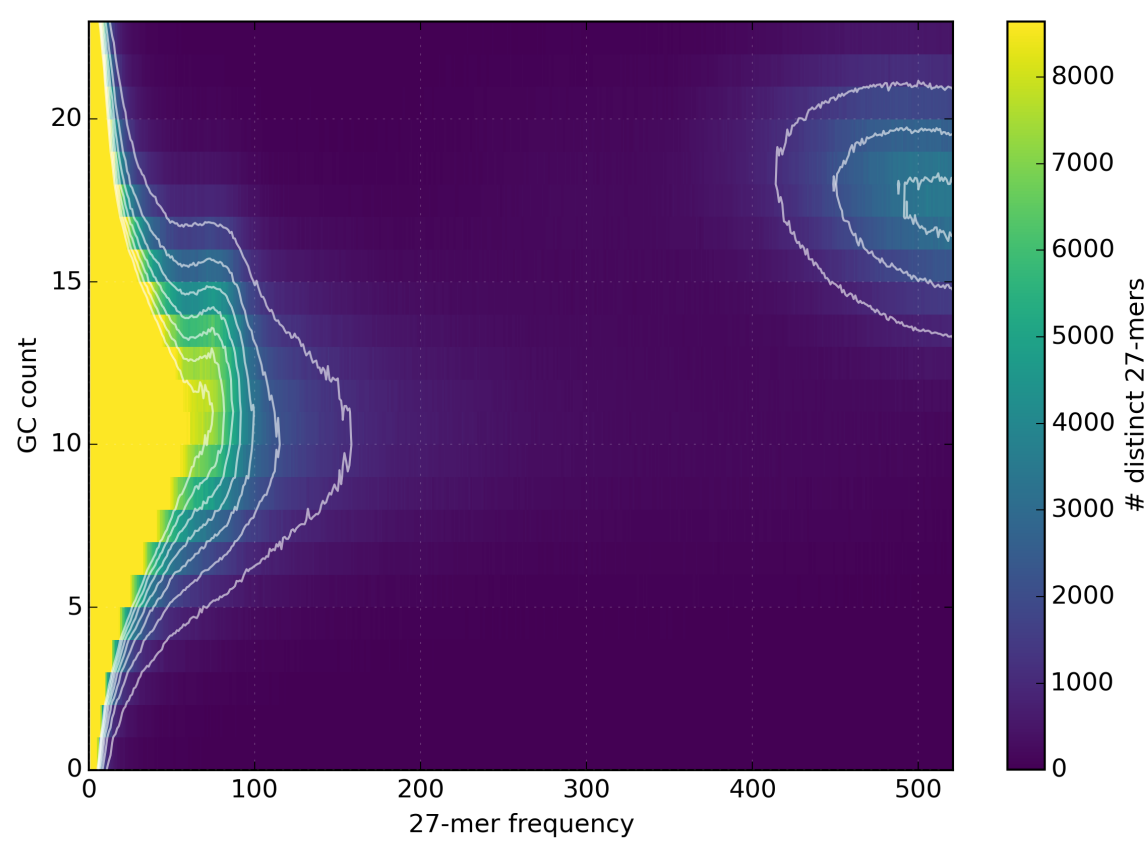**E**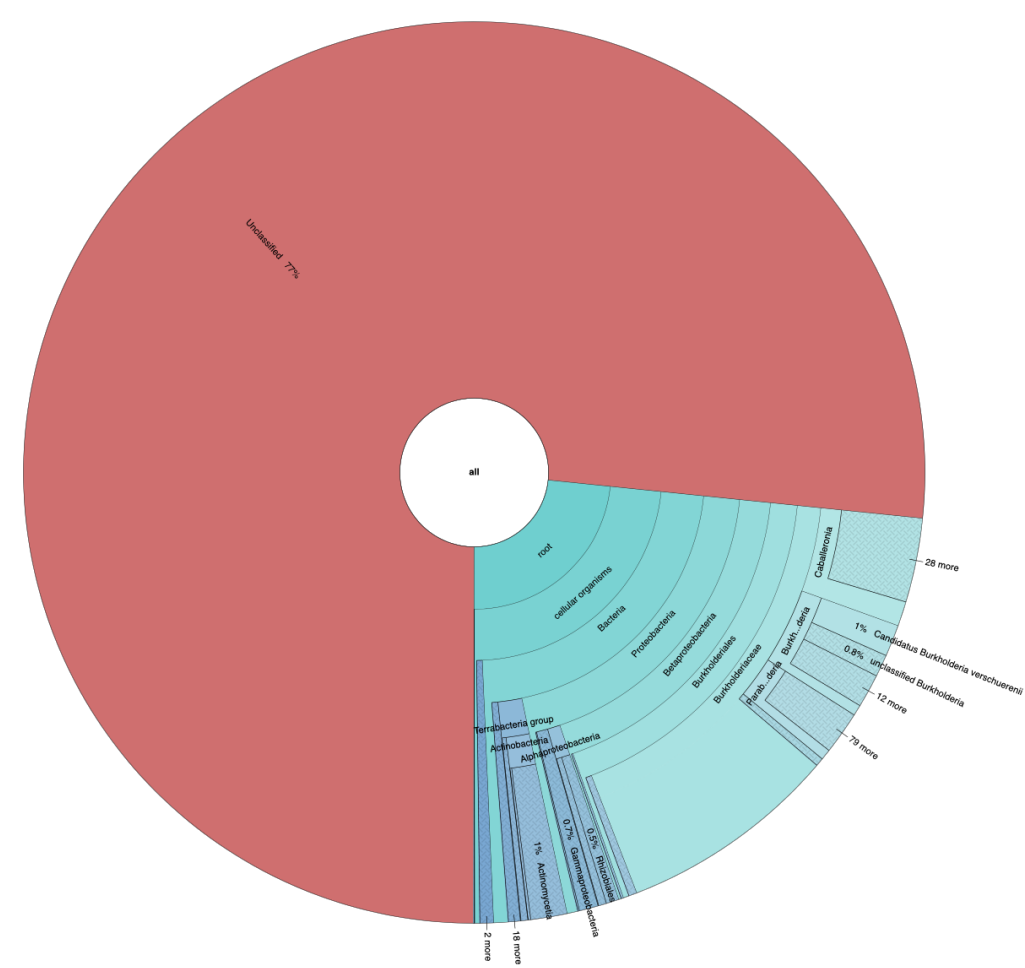**F**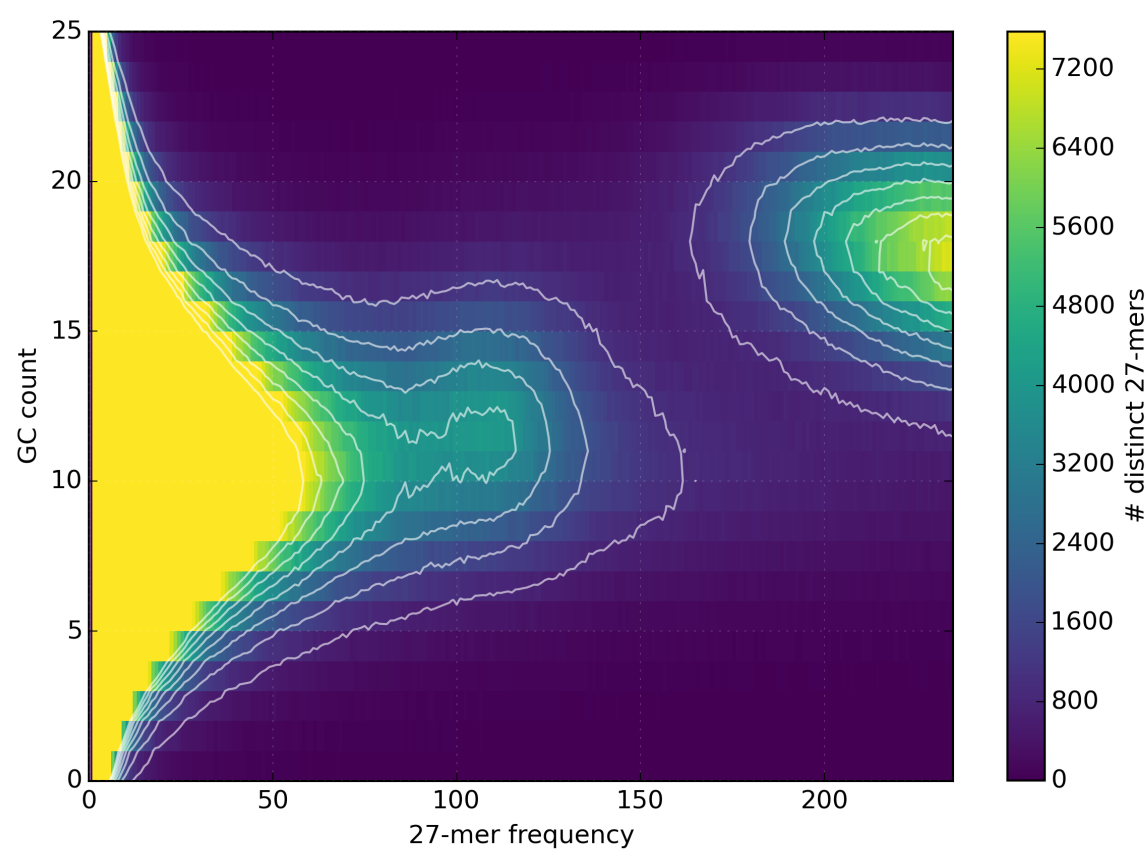**G**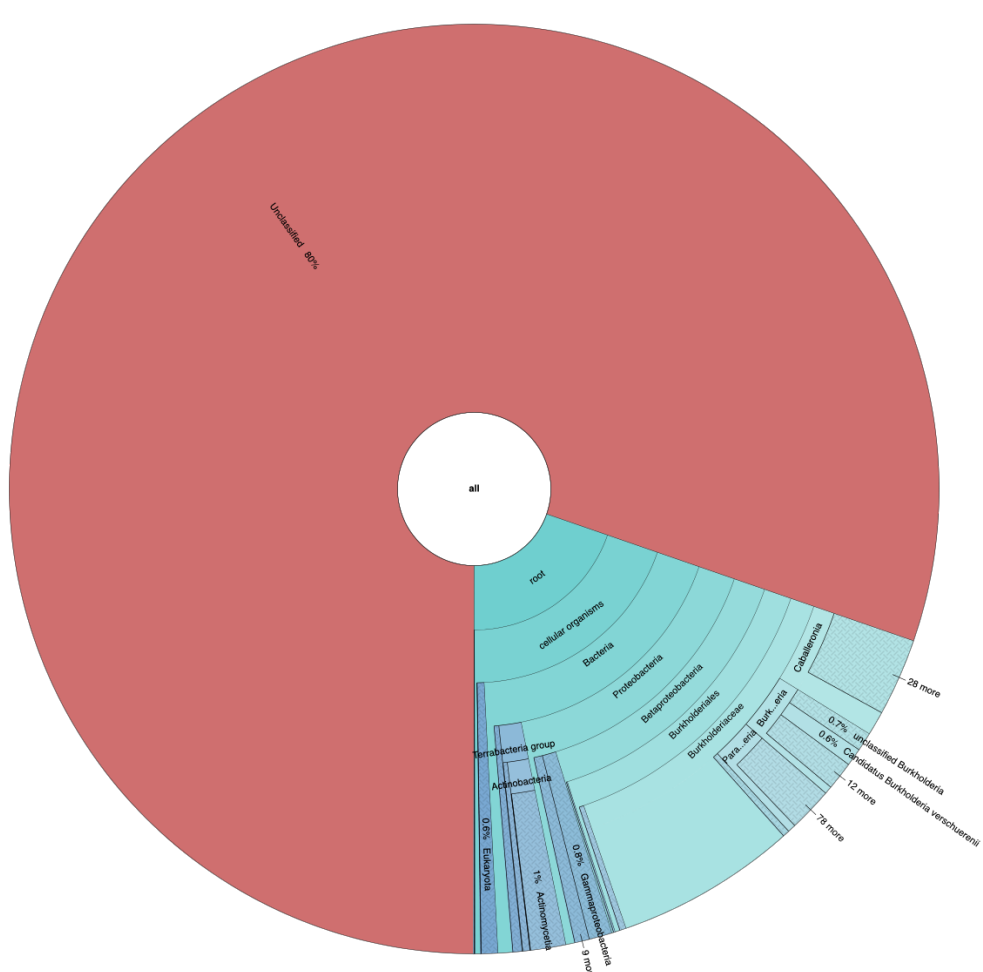**H**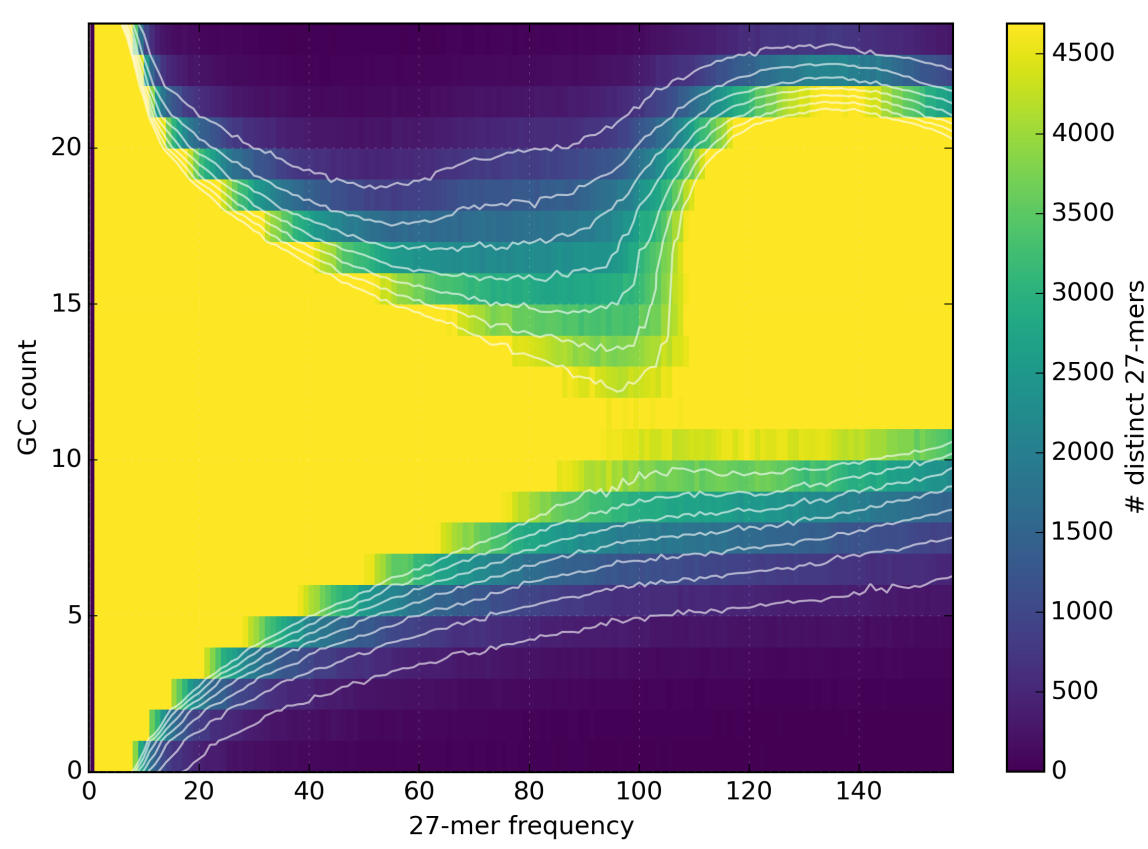

Supplement: Figure_S1.pdf [file Figure_S1.pdf]
